# Supplementary material for: Betel leaf extract and its major component hydroxychavicol promote osteogenesis and alleviate glucocorticoid-induced osteoporosis in rats
Source: Royal Society of Chemistry journal article supplement (doi:10.1039/d0fo02619k), 2021-01-01
Supplement: d0fo02619k1.pdf [file d0fo02619k1.pdf]

**Betel leaf extract and its major component hydroxychavicol promote osteogenesis and  
alleviate glucocorticoid-induced osteoporosis in rats**

*Rutusmita Mishra<sup>a,\$</sup>, Neeladri Singha Das<sup>a,#</sup>, Ritu Varshney<sup>a,^</sup>, Kriti Juneja<sup>b,+</sup>,  
Debabrata Sircar<sup>b,&</sup>, Partha Roy<sup>a,\*</sup>*

*<sup>a</sup> Molecular Endocrinology Laboratory, Department of Biotechnology, Indian Institute of  
Technology Roorkee, Roorkee 247 667, Uttarakhand, India*

*<sup>b</sup> Plant Molecular Biology Laboratory, Department of Biotechnology, Indian Institute of  
Technology Roorkee, Roorkee 247 667, Uttarakhand, India*

<sup>\$</sup> rmishra@bt.iitr.ac.in ORCID ID: 0000-0002-2851-7963

<sup>#</sup> neeladridas884@gmail.com

<sup>^</sup> rituvarshney.2019@gmail.com ORCID ID: 0000-0002-2290-6263

<sup>+</sup> kj4992@gmail.com

<sup>&</sup> dsircar.iitkgp@gmail.com ORCID ID: 0000-0002-2788-119X

\*Corresponding author: Tel. +91-1332-285686; Fax. +91-1332-273560;

E-mail: partha.roy@bt.iitr.ac.in ORCID ID: 0000-0003-1943-3079

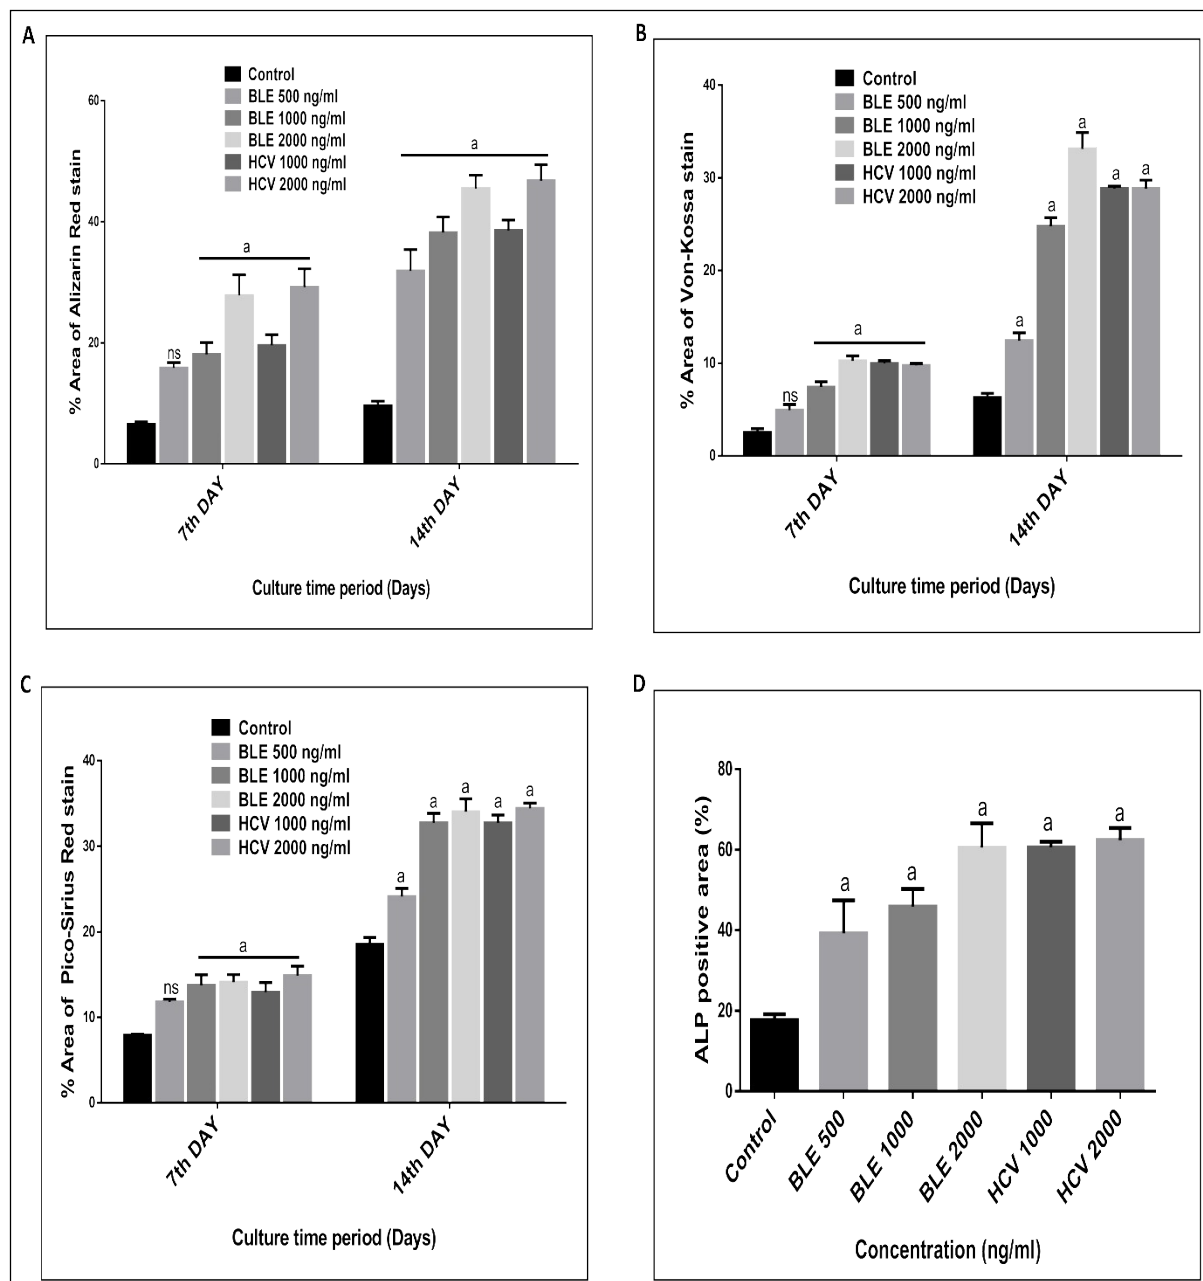

**Supplementary Figure 1.** Quantitative estimation of cells stained with various osteogenic markers. C3H10T1/2 cells were treated with BLE (500, 1000, 2000 ng/ml) and HCV (1000, 2000 ng/ml) for either 7 and 14 days (Fig. 4) or only 7 days (Fig. 5A) with OM in individual experiments. The corresponding stained area as shown in Fig. 4 and 5A were quantified with image J software. The bar graphs show the quantitative estimation of (A) Alizarin Red staining; (B) Von-Kossa staining; (C) Pico-Sirius Red staining as shown in Fig. 4 and (D) ALP staining

as shown in Fig. 5A. Results are mean  $\pm$  SEM of three independent experiments., <sup>a</sup>p<0.05 versus respective vehicle treated control groups in each experiment. ns, non-significant; BLE, betel leaf extract; HCV, hydroxychavicol; OM, osteogenic media; ALP, alkaline phosphatase.

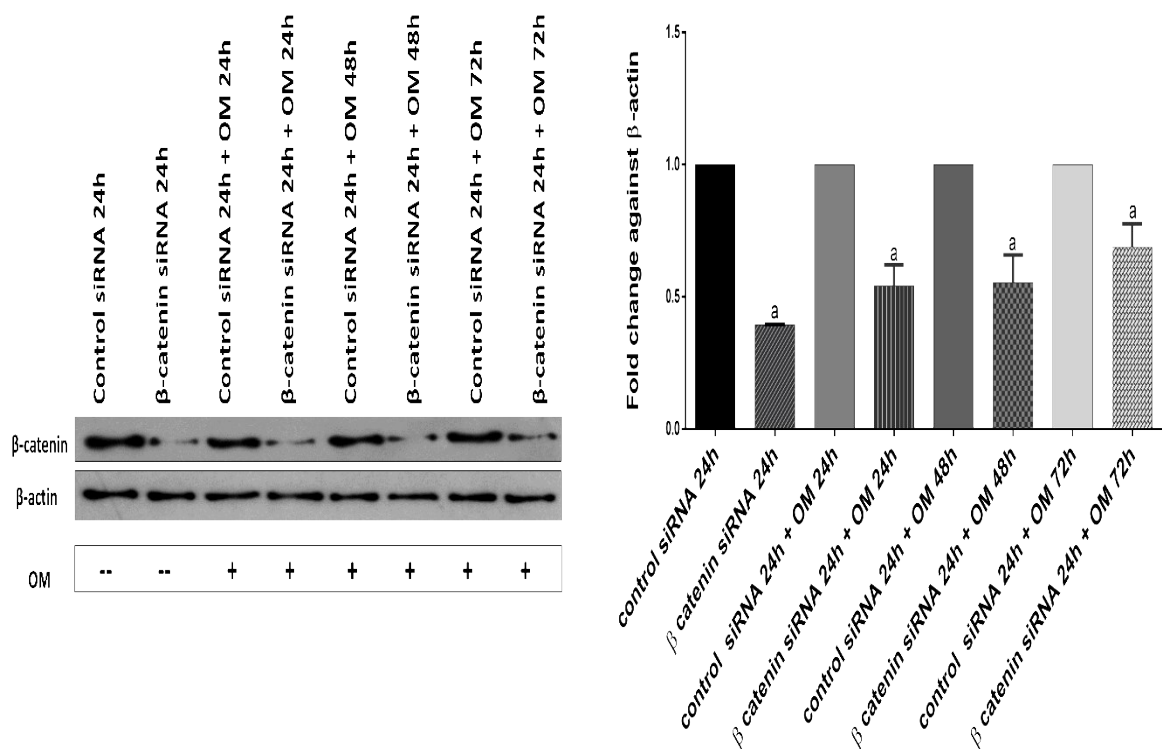

**Supplementary Figure 2. Time dependent inhibition of β-catenin protein expression in response to its siRNA treatment.** C3H10T1/2 cells were pre-treated with β-catenin siRNA and control siRNA for 24 h in PM. After 24 h the media was replaced with OM and incubated for different time intervals (24, 48 and 72 h post-siRNA treatment). Representative images showing immunoblots of β-catenin expression at different time intervals. The bar graph represents the mean relative arbitrary pixels intensities expressed as fold change with respect to β-actin (internal control) where the control siRNA or control siRNA + OM treated cells at respective time points were assigned a value of 1. Results are mean ± SEM of three independent experiments. <sup>a</sup> $p < 0.05$  versus control siRNA of respective groups. PM, proliferation media; OM, osteogenic media.

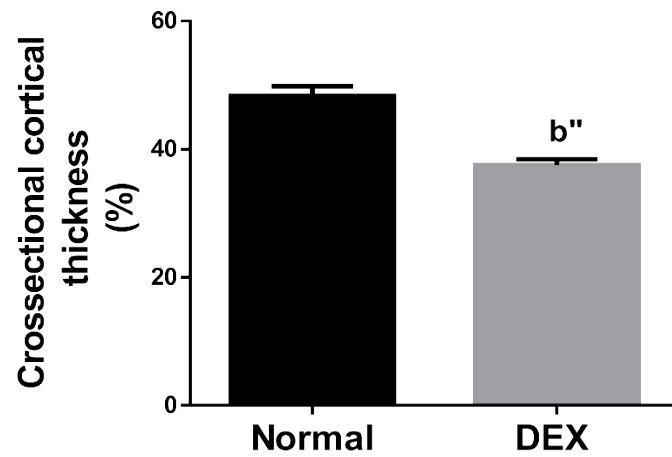

**Supplementary Figure 3. Quantification of crosssectional cortical thickness in various groups of animals.** Data are mean  $\pm$  SEM of  $n = 5$  for each group; <sup>b''</sup> $p < 0.05$  versus normal untreated control. Dex, dexamethasone.
